# Supplementary material for: Towards the development of chitosan nanoparticles for plutonium pulmonary decorporation
Source: Royal Society of Chemistry journal article supplement (doi:10.1039/c8dt02419g), 2018-01-01
Supplement: c8dt02419g1.pdf [file c8dt02419g1.pdf]

## Supporting Information

### Towards the developpement of chitosan nanoparticules for plutonium pulmonary decorporation

Laurane Léost,<sup>a</sup> Jérôme Roques,<sup>b</sup> Anne Van De Meeren,<sup>c</sup> Luc Vincent,<sup>a</sup> Nicolas Sbirrazzuoli,<sup>a</sup> Christoph Hennig,<sup>d</sup> André Rossberg,<sup>d</sup> Jean Aupiais,<sup>e</sup> Sophie Pagnotta,<sup>f</sup> Christophe Den Auwer\*<sup>a</sup>, Christophe Di Giorgio\*<sup>a</sup>

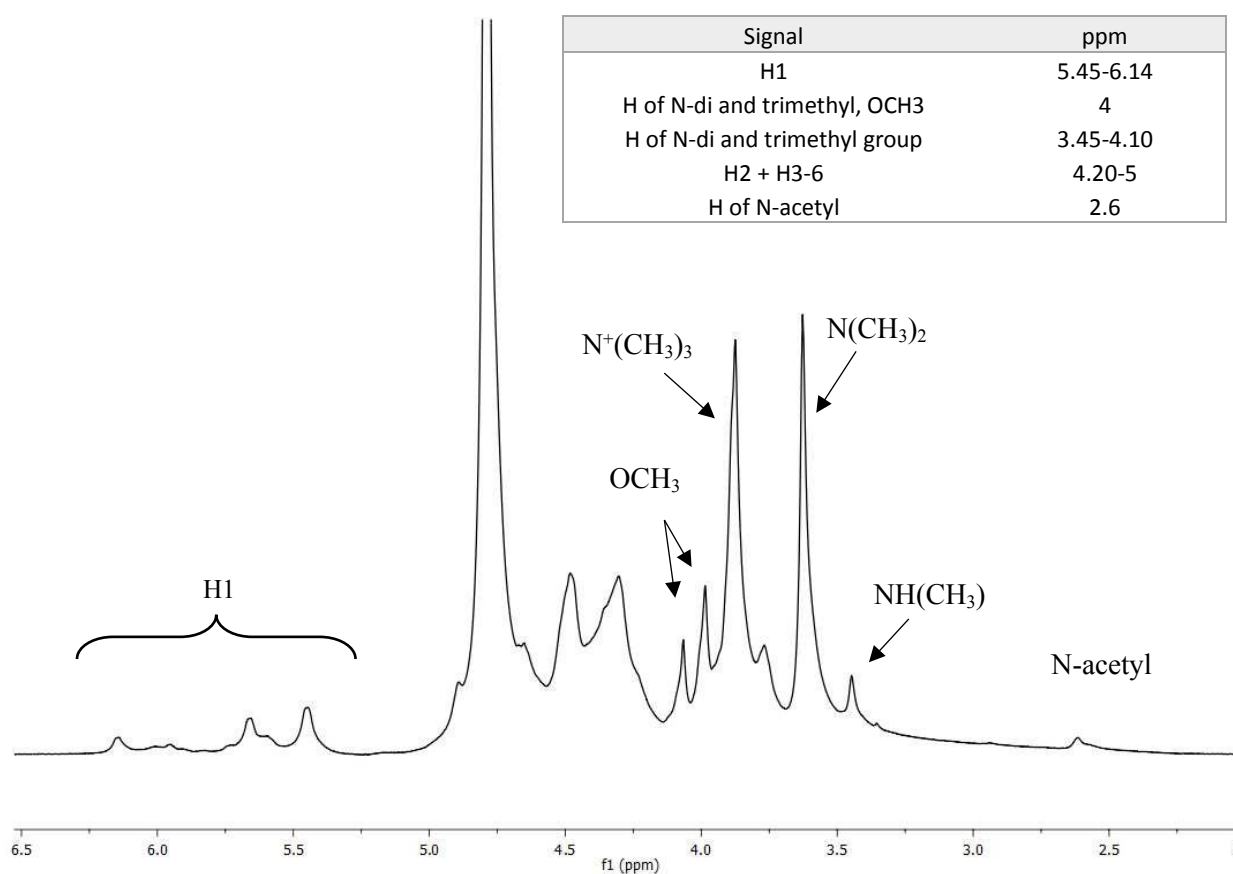

**Figure 1S:** RMN spectrum of TMC with the by-products. The polymer presented several pics for the H anomeric due to the composition of the sample: N-trimethyl chitosan, N-dimethyl chitosan, N-methyl chitosan and O-methyl chitosan.

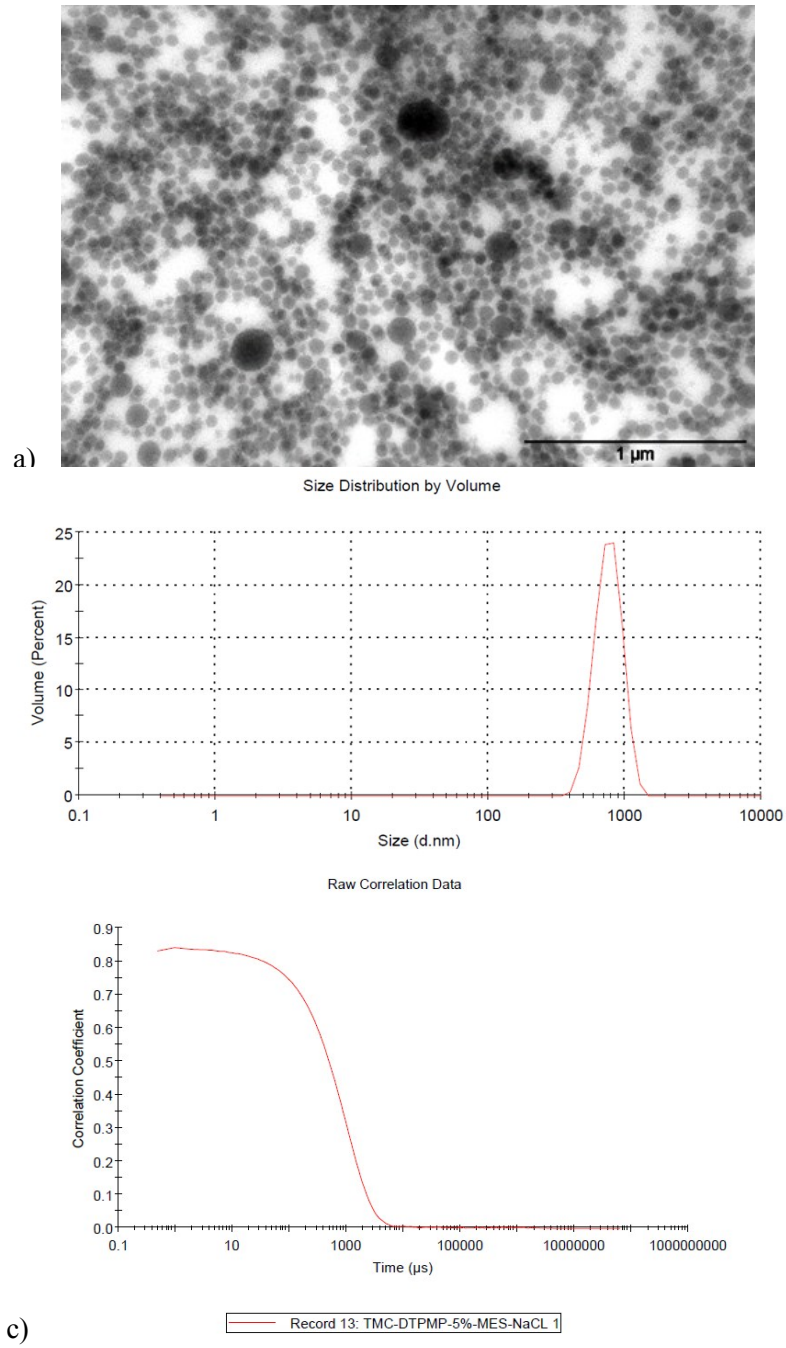

**Figure 2S:** Characterization of TMC-DTPMP(5 %): a) TEM image; b) DLS profile and c) Correlation curve.

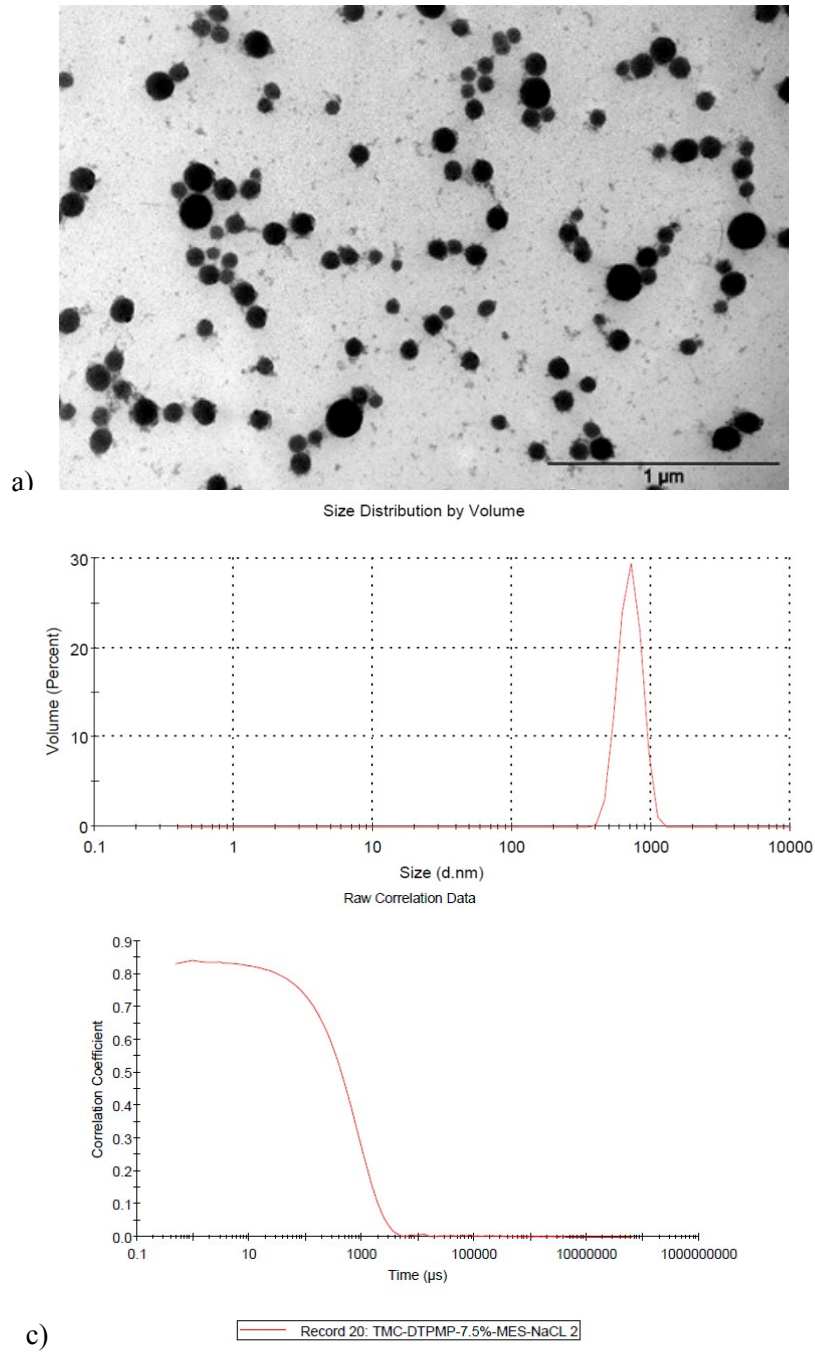

**Figure 3S:** Characterization of TMC-DTPMP(7.5 %): a) TEM image; b) DLS profile and c) Correlation curve.

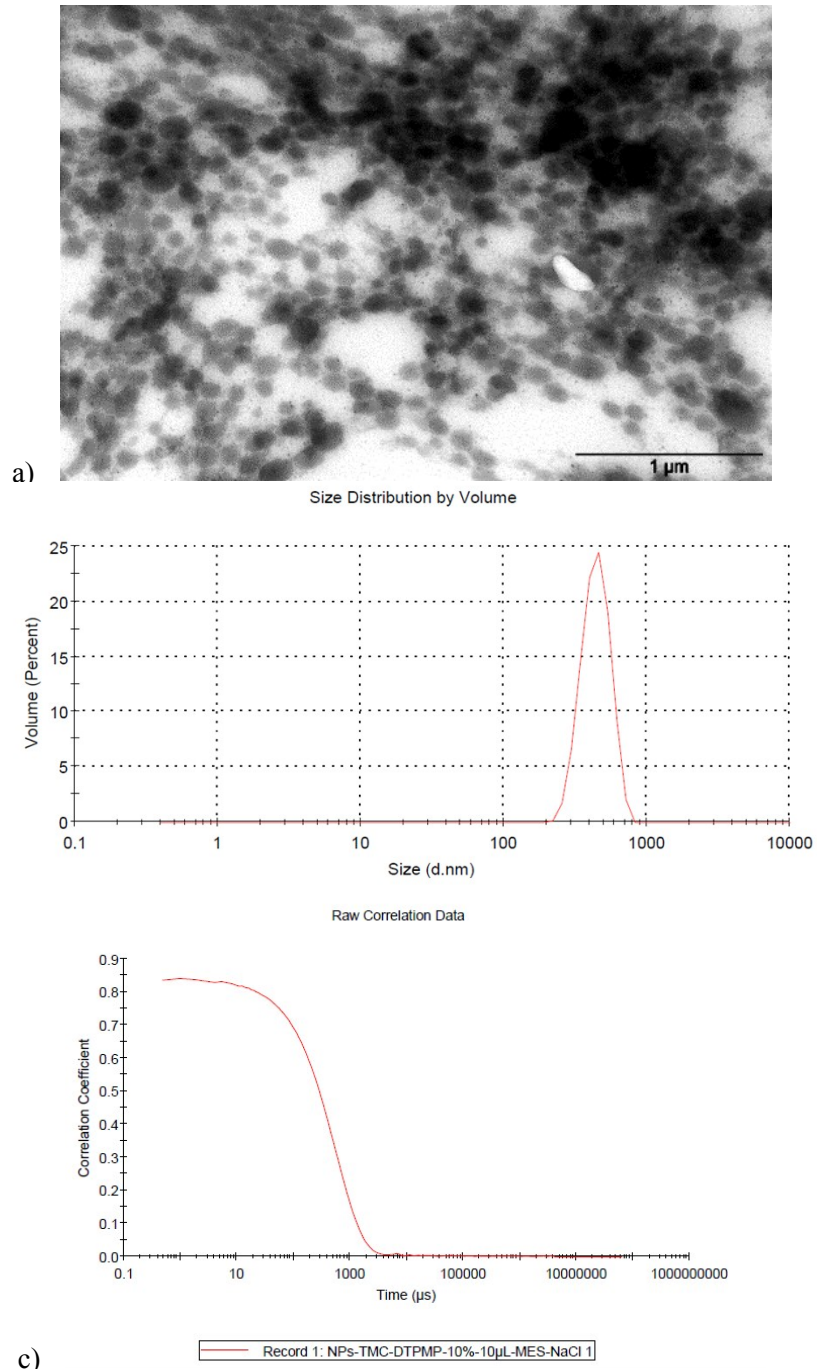

**Figure 4S:** Characterization of TMC-DTPMP(10 %): a) TEM image; b) DLS profile and c) Correlation curve.

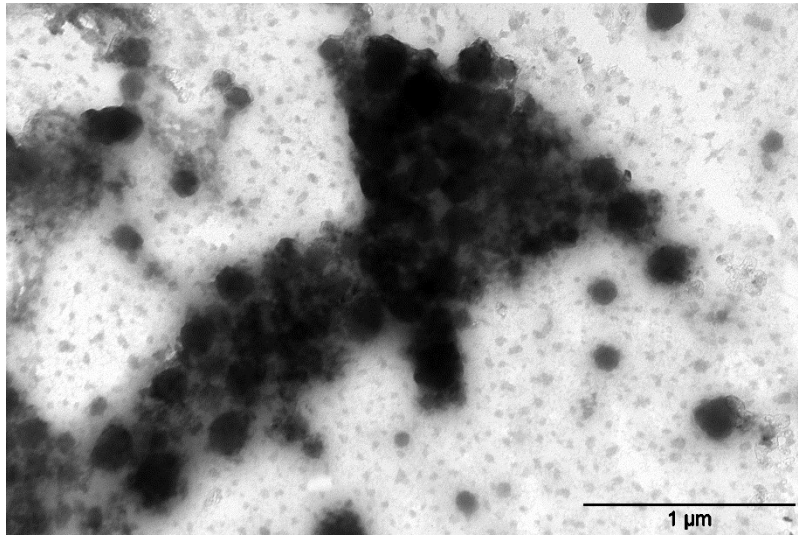

**Figure 5S:** TEM images of an aggregate of TMC-DTPMP(10%).

a)

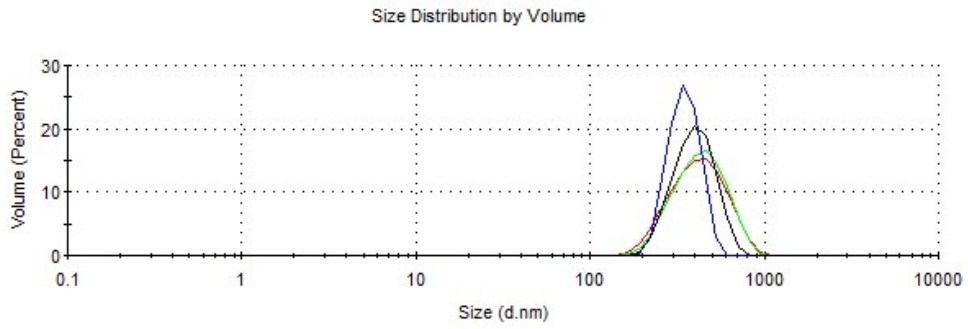

b)

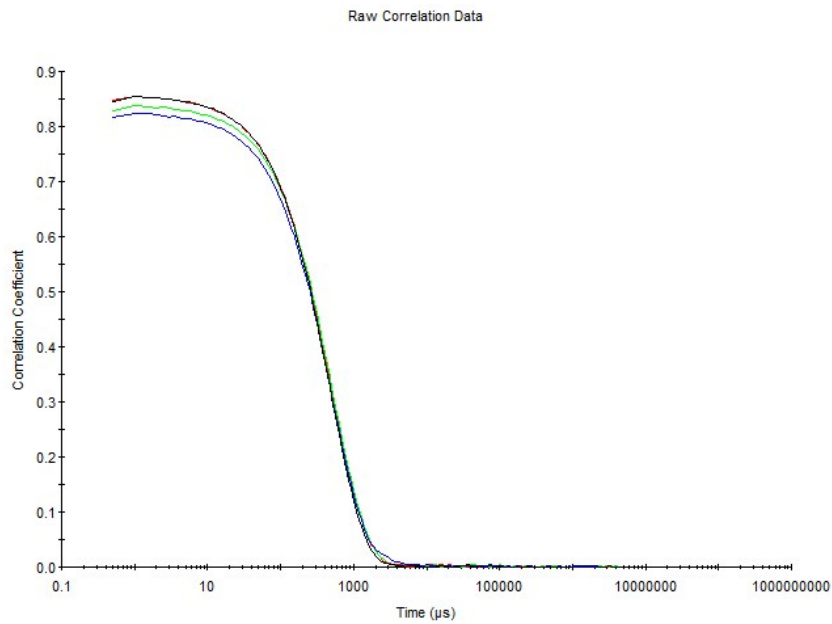

c)

| Ratio Th : DTPMP (NPs) | Size (nm) | PDI  |
|------------------------|-----------|------|
| 1                      | 455 ± 105 | 0.16 |
| 2.5                    | 382 ± 45  | 0.21 |
| 5                      | 403 ± 38  | 0.15 |
| Without Th             | 393 ± 38  | 0.17 |

**Figure 6S:** DLS characterization of TMC-DTPMP(10 %) NPs with different ratio of Th(IV) (1, 2.5, 5) a) DLS profiles ; b) Correlation curves and c) Summary table of size and polydispersity index.

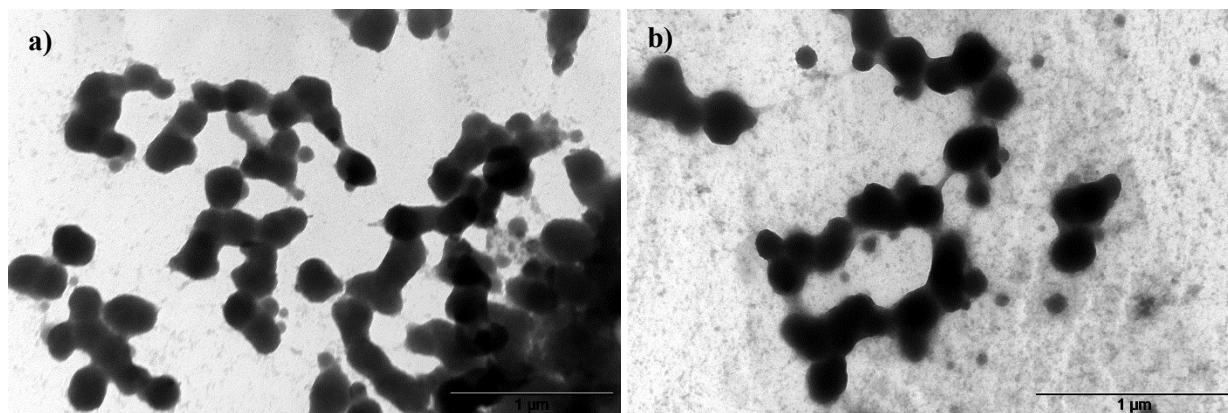

**Figure 7S:** TEM images of TMC-DTPMP(10%) NPs in the presence of Fe(III) (DTPMP : Fe = 1 : 2) at a) t: 0 h and b) t: 24 h. Fe(III) does not seem to affect the nanostructuration of TMC-DTPMP during 24 hours.

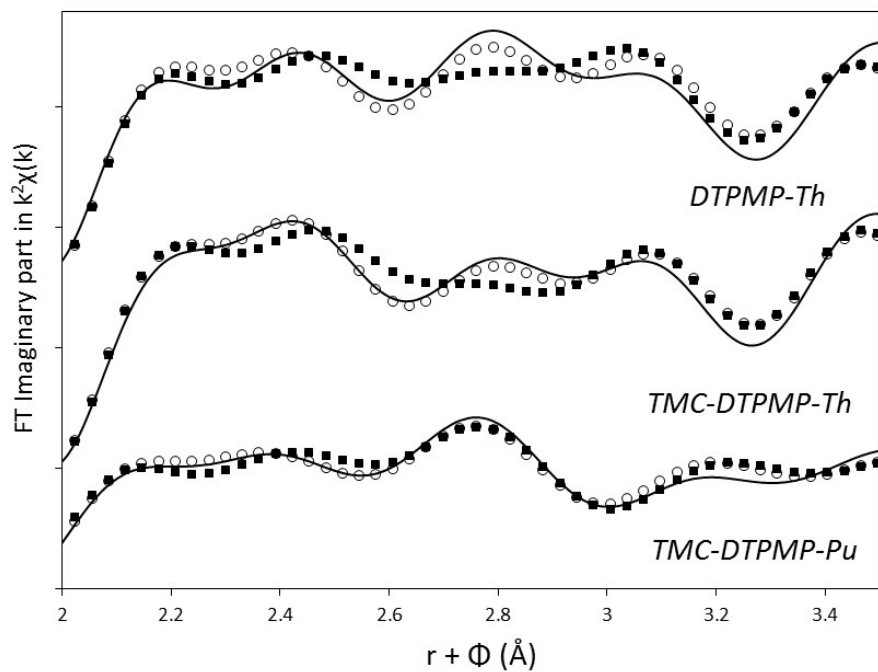

**Figure 8S:** Imaginary part of the FT of the EXAFS spectrum of the free DTPMP-Th complex and TMC-DTPMP NPs-An(IV) (An = Th and Pu) complexes in MES/NaCl pH 6.5 solution; Solid line = experimental spectrum, dots = adjustment with one bidendate phosphonate and two monodentate phosphonate, squares = adjustment with only monodentate coordination.



**Table 1S:** Full list of calculated distances of *DTPMP-An* complexes with DFT (An = Th, Pu).

|              | Distance (Å) | Mean (Å) |              | Distance (Å) | Mean (Å) |
|--------------|--------------|----------|--------------|--------------|----------|
| Th-Omono     | 2.21         | 2.33     | Pu-Omono     | 2.09         | 2.25     |
|              | 2.23         |          |              | 2.11         |          |
| Th-Obi       | 2.39         |          | Pu-Obi       | 2.27         |          |
|              | 2.49         |          |              | 2.53         |          |
|              |              |          |              |              |          |
| Th-P         | 3.8          | 3.77     | Pu-P         | 3.7          | 3.665    |
|              | 3.74         |          |              | 3.63         |          |
|              | 3.13         | 3.13     |              | 3.09         | 3.09     |
|              |              |          |              |              |          |
| Th-OH2       | 2.83         | 2.7225   | Pu-OH2       | 2.97         | 2.6925   |
|              | 2.68         |          |              | 2.71         |          |
|              | 2.72         |          |              | 2.5          |          |
|              | 2.66         |          |              | 2.59         |          |
|              |              |          |              |              |          |
| Angle Th-O-P | 172          | 162.5    | Angle Pu-O-P | 169          | 160.5    |
|              | 153          |          |              | 152          |          |

**Data calculations form DFT: Pu(IV) in interaction with two monodentate phosphonates, one bidentate phosphonate and four water molecules**

|   | x         | y         | z         |
|---|-----------|-----------|-----------|
| P | -2.993519 | -0.298169 | -1.458123 |
| O | -3.268636 | -0.518244 | -2.945267 |
| O | -4.020236 | -0.840365 | -0.451515 |
| O | -1.581311 | -1.009133 | -1.075864 |
| C | -2.691011 | 1.55604   | -1.32124  |
| H | -3.38014  | 1.952893  | -2.072047 |
| H | -1.677226 | 1.719362  | -1.720201 |
| N | -2.878967 | 2.319885  | -0.067121 |
| P | -5.547842 | 3.24263   | -0.202662 |
| O | -6.300946 | 4.536306  | -0.149415 |
| O | -5.892186 | 2.248237  | 1.041609  |
| O | -5.843    | 2.299047  | -1.483281 |
| H | -6.271673 | 2.729966  | 1.79859   |
| H | -6.785223 | 2.083123  | -1.605724 |
| C | -3.733556 | 3.488351  | -0.248541 |
| H | -3.578722 | 4.18183   | 0.586111  |
| H | -3.513742 | 4.060358  | -1.167842 |
| C | -1.631977 | 2.707329  | 0.621201  |
| C | -0.897254 | 1.467604  | 1.126826  |
| H | -1.913523 | 3.311746  | 1.490849  |
| H | -0.98797  | 3.335157  | -0.023795 |
| H | -1.660343 | 0.850099  | 1.605027  |
| H | -0.526576 | 0.893642  | 0.280154  |
| N | 0.17839   | 1.714486  | 2.10951   |
| P | 5.773749  | 3.128841  | -0.299711 |
| O | 6.80312   | 3.836177  | 0.525948  |
| O | 5.095899  | 4.089252  | -1.430058 |

|    |           |           |           |
|----|-----------|-----------|-----------|
| O  | 6.293102  | 1.881858  | -1.19305  |
| H  | 5.183758  | 5.032511  | -1.202416 |
| H  | 7.014078  | 2.104674  | -1.809609 |
| C  | 4.429314  | 2.368208  | 0.687906  |
| H  | 4.035623  | 3.202249  | 1.280066  |
| H  | 4.920065  | 1.68657   | 1.401463  |
| N  | 3.354847  | 1.727443  | -0.069688 |
| P  | 2.539677  | -0.638855 | -1.426288 |
| O  | 3.059449  | -0.406094 | -2.833517 |
| O  | 1.025555  | -0.205594 | -1.181317 |
| O  | 2.477287  | -2.138668 | -0.947219 |
| C  | 3.592477  | 0.276694  | -0.196728 |
| H  | 4.619819  | 0.152568  | -0.550748 |
| H  | 3.522964  | -0.254104 | 0.766976  |
| C  | 2.008049  | 2.164247  | 0.35686   |
| C  | 1.563255  | 1.485953  | 1.65718   |
| H  | 1.314835  | 1.938086  | -0.4536   |
| H  | 2.030976  | 3.254136  | 0.472634  |
| H  | 1.737015  | 0.407926  | 1.549941  |
| H  | 2.217057  | 1.824109  | 2.473337  |
| P  | -0.024168 | -0.958337 | 3.222877  |
| O  | -1.116931 | -1.476546 | 4.152682  |
| O  | 1.400445  | -1.530441 | 3.430221  |
| O  | -0.402778 | -1.268436 | 1.666343  |
| C  | -0.049728 | 0.932819  | 3.332051  |
| H  | 0.699047  | 1.220323  | 4.081662  |
| H  | -1.032313 | 1.193033  | 3.739665  |
| Pu | 0.044453  | -2.030821 | -0.248275 |
| O  | -0.215653 | -4.726265 | -0.182649 |
| H  | 0.629526  | -5.206826 | -0.199451 |

|   |           |           |           |
|---|-----------|-----------|-----------|
| H | -0.780477 | -5.167083 | -0.839743 |
| O | 1.649187  | -3.111097 | 1.335356  |
| H | 1.66982   | -2.543111 | 2.17505   |
| H | 2.455093  | -2.906204 | 0.814899  |
| O | -2.656137 | -3.030377 | 0.476794  |
| H | -3.100974 | -3.886493 | 0.378315  |
| H | -3.246964 | -2.343753 | 0.073571  |
| O | 0.342039  | -2.817105 | -2.697264 |
| H | 1.282007  | -3.063488 | -2.779722 |
| H | -0.176336 | -3.524041 | -3.117208 |

**Data calculations form DFT:** Th(IV) in interaction with two monodentate phosphonates, one bidentate phosphonate and four water molecules.

|   | x         | y         | z         |
|---|-----------|-----------|-----------|
| P | -2.916636 | -0.201386 | -1.549953 |
| O | -3.111619 | -0.255084 | -3.069785 |
| O | -4.035164 | -0.791429 | -0.667053 |
| O | -1.592173 | -1.012576 | -1.1458   |
| C | -2.6206   | 1.636542  | -1.242176 |
| H | -3.304554 | 2.08764   | -1.965439 |
| H | -1.604545 | 1.860341  | -1.606415 |
| N | -2.856585 | 2.275326  | 0.072191  |
| P | -5.503034 | 3.261872  | -0.12592  |
| O | -6.25075  | 4.554211  | 0.004212  |
| O | -5.942049 | 2.158714  | 0.98838   |
| O | -5.716679 | 2.453088  | -1.512477 |
| H | -6.371617 | 2.570508  | 1.759245  |
| H | -6.650256 | 2.26761   | -1.725409 |
| C | -3.685198 | 3.47407   | -0.036987 |
| H | -3.563615 | 4.074675  | 0.871022  |
| H | -3.406138 | 4.130243  | -0.882121 |
| C | -1.627374 | 2.581107  | 0.834736  |
| C | -0.872315 | 1.30061   | 1.193082  |
| H | -1.923235 | 3.082682  | 1.762279  |
| H | -0.973276 | 3.278148  | 0.275459  |
| H | -1.617802 | 0.585141  | 1.545151  |
| H | -0.44284  | 0.865541  | 0.28994   |
| N | 0.165734  | 1.489     | 2.234291  |
| P | 5.43832   | 3.486507  | -0.255687 |
| O | 6.511823  | 4.225505  | 0.482121  |
| O | 4.416948  | 4.475263  | -1.054531 |

|    |           |           |           |
|----|-----------|-----------|-----------|
| O  | 5.927878  | 2.48886   | -1.437261 |
| H  | 4.418039  | 5.374694  | -0.685377 |
| H  | 6.474845  | 2.920503  | -2.119818 |
| C  | 4.42198   | 2.370359  | 0.786526  |
| H  | 4.037658  | 3.009347  | 1.590979  |
| H  | 5.115424  | 1.665598  | 1.266563  |
| N  | 3.33954   | 1.709757  | 0.0616    |
| P  | 2.602618  | -0.587808 | -1.452764 |
| O  | 3.183381  | -0.331391 | -2.831968 |
| O  | 1.087281  | -0.163245 | -1.267411 |
| O  | 2.529803  | -2.1008   | -0.988953 |
| C  | 3.628964  | 0.284768  | -0.166494 |
| H  | 4.658523  | 0.210871  | -0.531013 |
| H  | 3.578362  | -0.308971 | 0.761751  |
| C  | 1.984357  | 2.056849  | 0.550269  |
| C  | 1.564395  | 1.290901  | 1.813362  |
| H  | 1.285142  | 1.852487  | -0.258464 |
| H  | 1.966516  | 3.136997  | 0.729616  |
| H  | 1.769136  | 0.223773  | 1.663244  |
| H  | 2.196897  | 1.60525   | 2.654656  |
| P  | -0.092017 | -1.203362 | 3.277836  |
| O  | -1.193656 | -1.745015 | 4.19181   |
| O  | 1.338047  | -1.761522 | 3.539728  |
| O  | -0.417628 | -1.484273 | 1.731774  |
| C  | -0.115599 | 0.68072   | 3.431086  |
| H  | 0.601176  | 0.951974  | 4.216825  |
| H  | -1.112027 | 0.943783  | 3.802164  |
| Th | 0.125949  | -2.137852 | -0.334    |
| O  | -0.048654 | -4.856999 | -0.318596 |
| H  | 0.765778  | -5.306174 | -0.037577 |

|   |           |           |           |
|---|-----------|-----------|-----------|
| H | -0.365082 | -5.336085 | -1.101746 |
| O | 1.664694  | -3.378665 | 1.459802  |
| H | 1.629385  | -2.794439 | 2.293099  |
| H | 2.570645  | -3.306744 | 1.107976  |
| O | -2.463239 | -3.154114 | 0.216303  |
| H | -2.843371 | -4.034501 | 0.051884  |
| H | -3.089945 | -2.473656 | -0.142509 |
| O | 0.388395  | -2.834467 | -2.915874 |
| H | 1.30318   | -3.01175  | -3.201336 |
| H | -0.202211 | -3.318816 | -3.519632 |
